# Supplementary material for: Nootkatol prevents ultraviolet radiation-induced photoaging via ORAI1 and TRPV1 inhibition in melanocytes and keratinocytes
Source: PubMed Central journal article supplement — Korean J Physiol Pharmacol. 2021 Jan 1;25(1):87–94. doi: 10.4196/kjpp.2021.25.1.87 (PMC7756533; doi:10.4196/kjpp.2021.25.1.87), 2021-01-01
Supplement: kjpp-25-1-87_supple.pdf [file kjpp-25-1-87_supple.pdf]

## SUPPLEMENTARY MATERIALS AND METHODS

### Valencene derivatives

Nootkatone is produced by valencene oxidation, during which nootkatol is a precursor to nootkatone. Decalin is a saturated analog of naphthalene, and all functional groups and double bonds in its chemical structure were removed, with only the two-ring structure of valencene remaining. Valencene-13-aldehyde was synthesized by adding an aldehyde functional group at the thirteenth carbon position of valencene.

### Nootkatol synthesis

Eight grams (40 mmol) of valencene ( $C_{15}H_{24}$ ; MW, 204 g) was dissolved in 200 ml of ethyl acetate. t-BHT (40 g), sodium bicarbonate (2 g), and sodium hypochlorite (40 mmol) were added and stirred for 8 h at 5–10°C. Sodium bisulfite (40 g) was added to the mixture and left overnight. Water layers were washed with ethyl acetate, and the dry reaction solution was distilled to synthesize nootkatone at a yield of 7.0 g (80.3% purity). To synthesize nootkatol, 8.72 g of nootkatone ( $C_{15}H_{22}O$ , MW, 218; 40 mmol) was dissolved in 50 ml of methanol (solution A). Another solution using 2.16 g (4 mmol) of sodium methoxide and 1.512 g (40 mmol) of  $NaBH_4$  (sodium borohydride) in 50 ml of methanol (solution B) was prepared. Solution B was mixed with solution A, and the two reacted at 25°C for 3 h. After the reaction, cold water was added to the reaction mixture, and excess  $NaBH_4$  was removed by adding 20 ml of 10% HCl. This solution was extracted thrice with ether and washed thrice with water. After drying the ether solution with anhydrous sodium sulfate, the solvent was removed and nootkatol was synthesized at a yield of 7.8 g (89.4% purity). The synthesis strategy is briefly described schematically in Supplementary Fig. 1B. Purity of the synthesized nootkatol was confirmed by gas chromatography-mass spectrometry (GC-MS). GC-MS data were obtained using an HP GC-MSD unit (6890 series; Hewlett-Packard, Palo Alto, CA, USA) with an HP-5MS capillary column (60.0 m  $\times$  250  $\mu$ m  $\times$  0.25  $\mu$ m, Hewlett-Packard). The results are shown in Supplementary Fig. 1C.

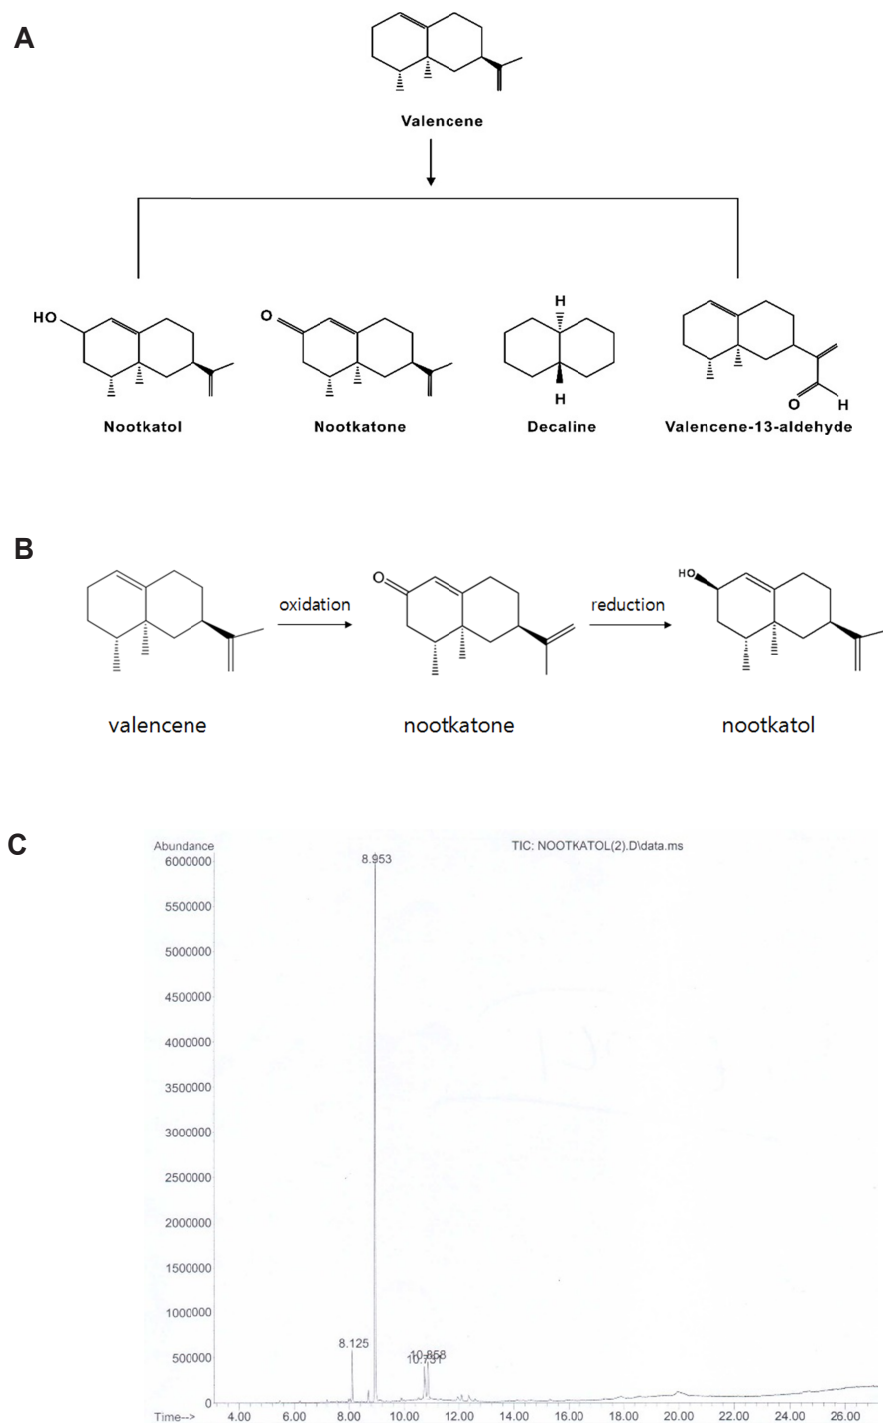

**Supplementary Fig. 1.** Chemical structures of valencene derivatives and synthesis of nootkatol. (A) The structure of various valencene derivatives, nootkatol, nootkatone, decaline and valencene-13-aldehyde. (B) Schematic diagram depicting nootkatol synthesis. (C) Total ion chromatogram of synthesized nootkatol. The main compound, nootkatol (89.4%, Rt [min] = 8.953), and its minor components are indicated.
